# Supplementary material for: Low-temperature synthesis of luminescent and mesoporous β-NaYF4 microspheres via polyol-mediated solvothermal route
Source: Royal Society of Chemistry journal article supplement (doi:10.1039/c3ra23028g), 2013-01-01
Supplement: c3ra23028g.pdf [file c3ra23028g.pdf]

## Electronic supplementary Information

### Low-temperature synthesis of luminescent and mesoporous $\beta$ -NaYF<sub>4</sub> microspheres via Polyol-Mediated Solvothermal Route

Xuesong Qu<sup>1,2</sup>, Guohui Pan<sup>3</sup>, Hyun Kyoung Yang<sup>2</sup>, Yeqing Chen<sup>2</sup>, Jong Won Chung<sup>2</sup>, Byung Kee Moon<sup>2</sup>, Byung Chun Choi<sup>2</sup>, Jung Hyun Jeong<sup>2,1</sup>, kiwan Jang<sup>4</sup>

<sup>1</sup>*Department of Physics, Changchun Normal University, Changchun 130032, China*

<sup>2</sup>*Department of Physics, Pukyong National University, Korea Busan 608-737, South Korea*

<sup>3</sup>*Institut de Recherche Interdisciplinaire (IRI, USR-3078), Parc de la Haute Borne, 50 Avenue de Halley, BP 70478, 59658 Villeneuve d'Ascq, France.*

<sup>4</sup>*Department of Physics, Changwon National University, Changwon 641 773, South Korea*

---

<sup>1</sup> To whom correspondence should be addressed. Email: [jhjeong@pknu.ac.kr](mailto:jhjeong@pknu.ac.kr)  
TEL: +82-51-629-5564, FAX: +82-51-629-5549

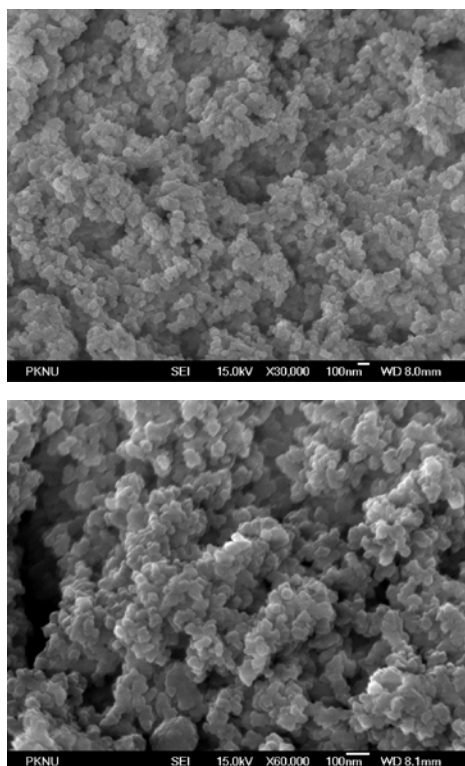

Fig. S1 FE-SEM images of NaYF<sub>4</sub> sample prepared at 80 °C for 2 h.

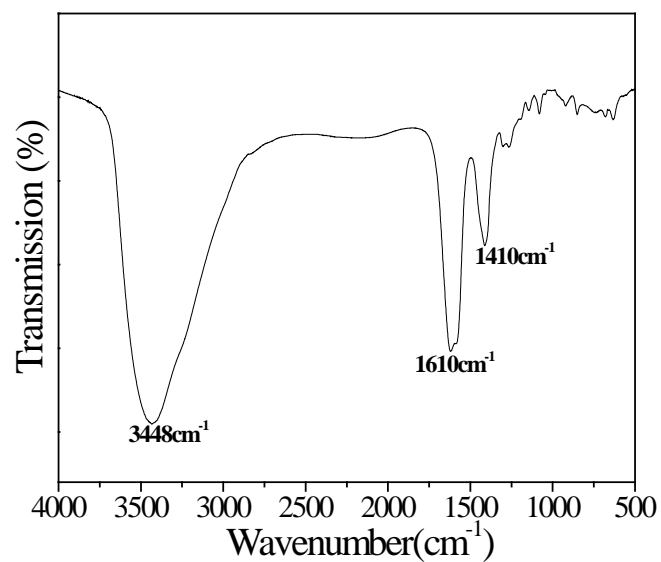

Fig. S2: FTIR spectrum of  $\beta$ -NaYF<sub>4</sub> mesoporous microspheres prepared at 80 °C for 12 h.

The broad absorption band appearing at 3448 cm<sup>-1</sup> is ascribable to the O-H vibration of absorbed H<sub>2</sub>O. The bands at about 1610 and 1410 cm<sup>-1</sup> are assigned to the COO<sup>-</sup> vibrations in the citrate. It suggests the presence of amounts of water and citrate ligands adsorbed in the final product.

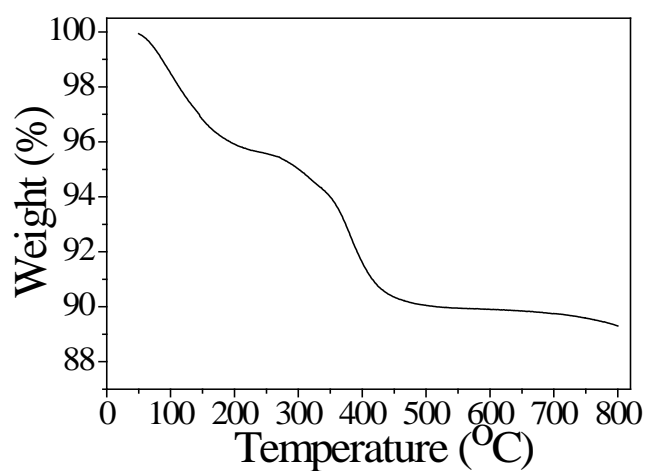

Fig. S3 Thermogravimetric analysis curve of  $\beta$ - NaYF<sub>4</sub> mesoporous microspheres prepared at 80 °C for 12 h.

There was ~ 11% weight loss assigned to desorption of water and citrate ligands from room temperature to 800 °C. The beginning stage ~ 4.08% loss (lower than 200 °C) should be corresponding to desorption of water molecules adsorbed in the product. According to the result of FTIR spectrum, the other weight loss (200-800 °C) may be related to the superposition of dehydration of O-H and decomposition of citrate ligands.

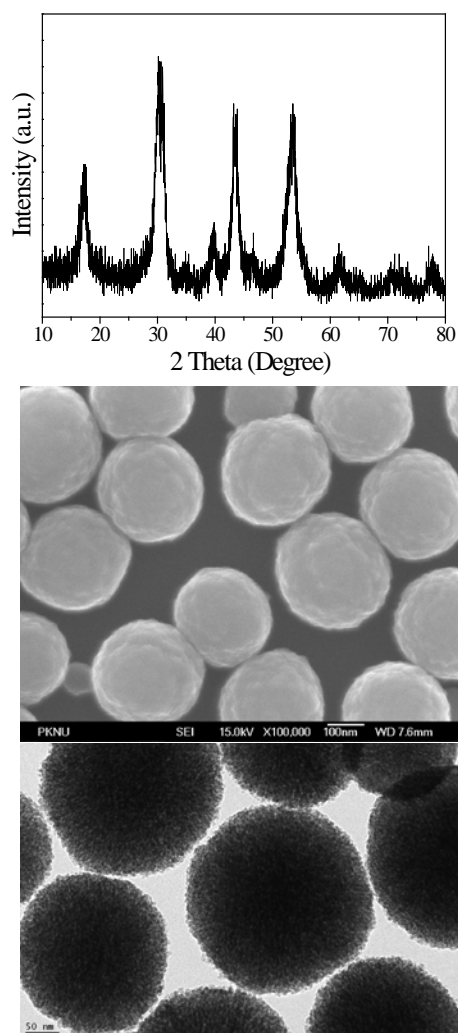

Fig. S4 XRD, SEM and TEM images of  $\beta$ -NaYF<sub>4</sub> mesoporous microspheres prepared at 180 °C for 1 h with the Cit<sup>3-</sup>/Y<sup>3+</sup> molar ratio of 3:1.

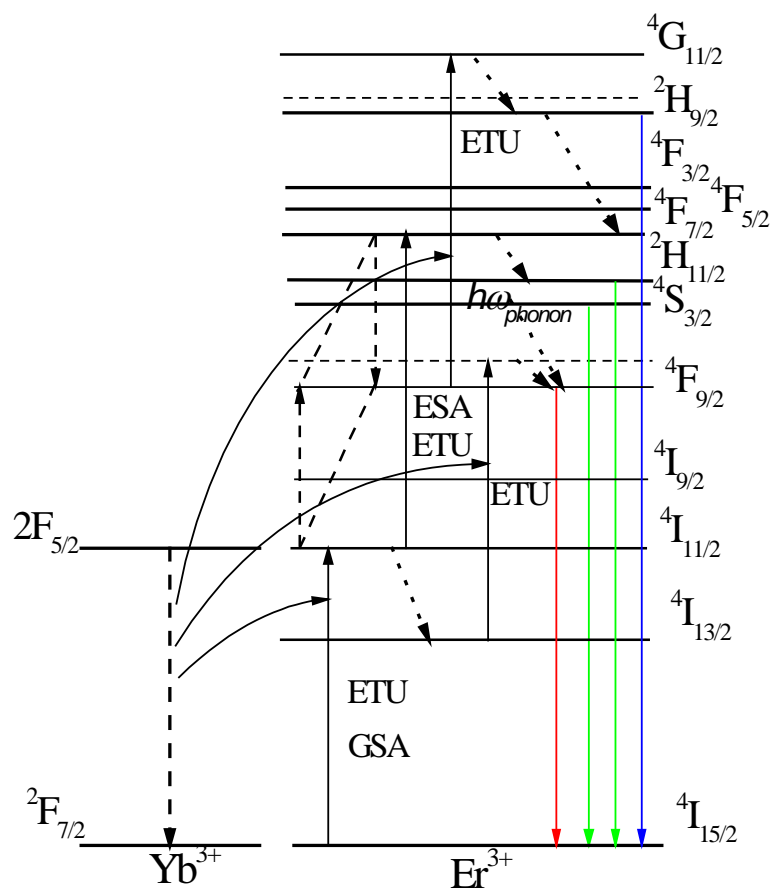

Fig. S5 Schematic representation of the ground-state absorption (GSA), excited-state absorption (ESA), and energy-transfer upconversion (ETU) mechanisms in  $\text{Yb}^{3+}, \text{Er}^{3+}$  co-doped  $\beta\text{-NaYF}_4$ .
